# Supplementary material for: Thermoresponsive cationic dendronized copolymers and their corresponding nanogels as smart gene carriers
Source: Royal Society of Chemistry journal article supplement (doi:10.1039/d0py00631a), 2020-01-01
Supplement: d0py00631a1.pdf [file d0py00631a1.pdf]

## Supplementary Information

### Thermoresponsive cationic dendronized copolymers and their corresponding nanogels as smart gene carriers

Di Wu,<sup>‡a</sup> Jianhui Wu,<sup>‡a</sup> Pei Tao,<sup>‡a</sup> Yi Yao,<sup>a</sup> Jing Wang,<sup>b</sup> Dongfei Liu,<sup>c</sup> Fuxue Chen,<sup>b</sup> Biyi Xu,<sup>a</sup> Wen Li,<sup>\*a</sup> and Afang Zhang<sup>a</sup>

<sup>a</sup>. Department of Polymer Materials, School of Materials Science and Engineering, Shanghai University, Nanchen Street 333, Shanghai 200444, China.

<sup>b</sup>. School of Life Science, Shanghai University, Nanchen Street 333, Shanghai 200444, China.

<sup>c</sup>. State Key Laboratory of Natural Medicines, Department of Pharmaceutics, China Pharmaceutical University, Nanjing 210009, China

\*E-mail: [wli@shu.edu.cn](mailto:wli@shu.edu.cn). Tel: +86-21-66138044

<sup>‡</sup> These authors contribute equally to this work.

## Table of Contents

|                                                                                                                                                                                                                                                                                          |     |
|------------------------------------------------------------------------------------------------------------------------------------------------------------------------------------------------------------------------------------------------------------------------------------------|-----|
| <b>Table S1.</b> Conditions for and results from the copolymerization of <b>MG1-OEt</b> with <b>MG1-Boc</b> .....                                                                                                                                                                        | S3  |
| <b>Table S2.</b> The elemental analysis results and the calculated molar ratio of <b>MG1-OEt/MG1-NH<sub>3</sub><sup>+</sup></b> with in <b>NGs</b> .....                                                                                                                                 | S3  |
| <b>Figure S1.</b> <sup>1</sup> H NMR spectrum of compound <b>2</b> in CDCl <sub>3</sub> .....                                                                                                                                                                                            | S3  |
| <b>Figure S2.</b> <sup>1</sup> H NMR spectrum of compound <b>3</b> in CDCl <sub>3</sub> .....                                                                                                                                                                                            | S4  |
| <b>Figure S3.</b> <sup>1</sup> H NMR spectrum of compound <b>4</b> in CDCl <sub>3</sub> .....                                                                                                                                                                                            | S4  |
| <b>Figure S4.</b> <sup>1</sup> H NMR spectrum of <b>MG1-Boc</b> in CDCl <sub>3</sub> .....                                                                                                                                                                                               | S5  |
| <b>Figure S5.</b> <sup>1</sup> H NMR spectrum of <b>MG1-NH<sub>3</sub><sup>+</sup></b> in CDCl <sub>3</sub> .....                                                                                                                                                                        | S5  |
| <b>Figure S6.</b> <sup>1</sup> H NMR spectrum of <b>P1-Boc</b> in d <sub>6</sub> -DMSO.....                                                                                                                                                                                              | S6  |
| <b>Figure S7.</b> <sup>1</sup> H NMR spectrum of <b>P2-Boc</b> in d <sub>6</sub> -DMSO.....                                                                                                                                                                                              | S6  |
| <b>Figure S8.</b> <sup>1</sup> H NMR spectrum of <b>P1</b> in d <sub>6</sub> -DMSO.....                                                                                                                                                                                                  | S7  |
| <b>Figure S9.</b> <sup>1</sup> H NMR spectrum of <b>P2</b> in d <sub>6</sub> -DMSO.....                                                                                                                                                                                                  | S7  |
| <b>Figure S10.</b> Hydrodynamic radius of <b>NGs</b> by dynamic light scattering in pH=7.4 PBS Buffer (C= 0.01 mol·L <sup>-1</sup> ) at different concentration and temperature. ....                                                                                                    | S8  |
| <b>Figure S11.</b> Plots of transmittance vs temperature for <b>P1</b> (a) and <b>P2</b> (b) in pH=7.4 PBS Buffer (C= 0.01 mol·L <sup>-1</sup> ) at different concentration, as well as (c) <i>T<sub>cp</sub></i> dependence of <b>P1</b> and <b>P2</b> on solution concentrations ..... | S8  |
| <b>Figure S12.</b> <i>R<sub>h</sub></i> of <b>NG/siRNA</b> complexes at different N/P ratios at room temperature. The complexes were incubated for 30 min before measurements (C = 0.05 mg·mL <sup>-1</sup> ).....                                                                       | S9  |
| <b>Figure S13.</b> Quantitative siRNA binding ability of <b>P1</b> and <b>P2</b> (a), as well as <b>NGs</b> (b) by adding fluorescent dye EB using fluorescence spectrophotometer.....                                                                                                   | S9  |
| <b>Figure S14.</b> Cell viability of BV2 cells after incubation with cationic copolymers <b>P1</b> , <b>P2</b> and <b>NGs</b> at given concentrations.....                                                                                                                               | S10 |
| <b>Figure S15.</b> CLSM images of BV2 cells after being treated with Cy5 - siRNA/ <b>P1</b> (a), Cy5 - siRNA/ <b>P2</b> (b), Cy5 - siRNA/ <b>NGs</b> (c), Cy5 - siRNA/Lipofectamine 3000 (d) complexes for 1-4 h at N/P ratio of 10 .....                                                | S10 |

**Table S1.** Conditions for and results from the copolymerization of **MG1-OEt** and **MG1-Boc**.

| Polymers  | Feed Ratio<br>( <b>MG1-OEt:MG1-Boc</b> ) | $M_n \times 10^5$<br>(kDa) <sup>a</sup> | PDI <sup>a</sup> | Actual<br>Ratio <sup>b</sup> | $T_c$ (°C) <sup>c</sup> |
|-----------|------------------------------------------|-----------------------------------------|------------------|------------------------------|-------------------------|
| <b>P1</b> | 15:1                                     | 3.02                                    | 2.60             | 12:1                         | 41.1                    |
| <b>P2</b> | 30:1                                     | 1.84                                    | 2.19             | 26:1                         | 37.3                    |

<sup>a</sup> Measured by GPC.

<sup>b</sup> Calculated from <sup>1</sup>H NMR spectra (Fig.S11 and Fig.S12) by comparing the integrations of peak a (from OEG dendrons) to peak c (from Boc groups).

<sup>c</sup> Determined by turbidity measurements using UV/Vis spectroscopy.

**Table S2.** The elemental analysis results and the calculated molar ratio of **MG1-OEt/MG1-NH<sub>3</sub><sup>+</sup>** within the NGs.

| Sample     | C (wt%) | N (wt%) | C/N    | Calculated molar ratio<br>of <b>MG1-OEt/MG1-NH<sub>3</sub><sup>+</sup></b> |
|------------|---------|---------|--------|----------------------------------------------------------------------------|
| <b>NGs</b> | 64.37   | 0.18    | 363.95 | 36:1                                                                       |

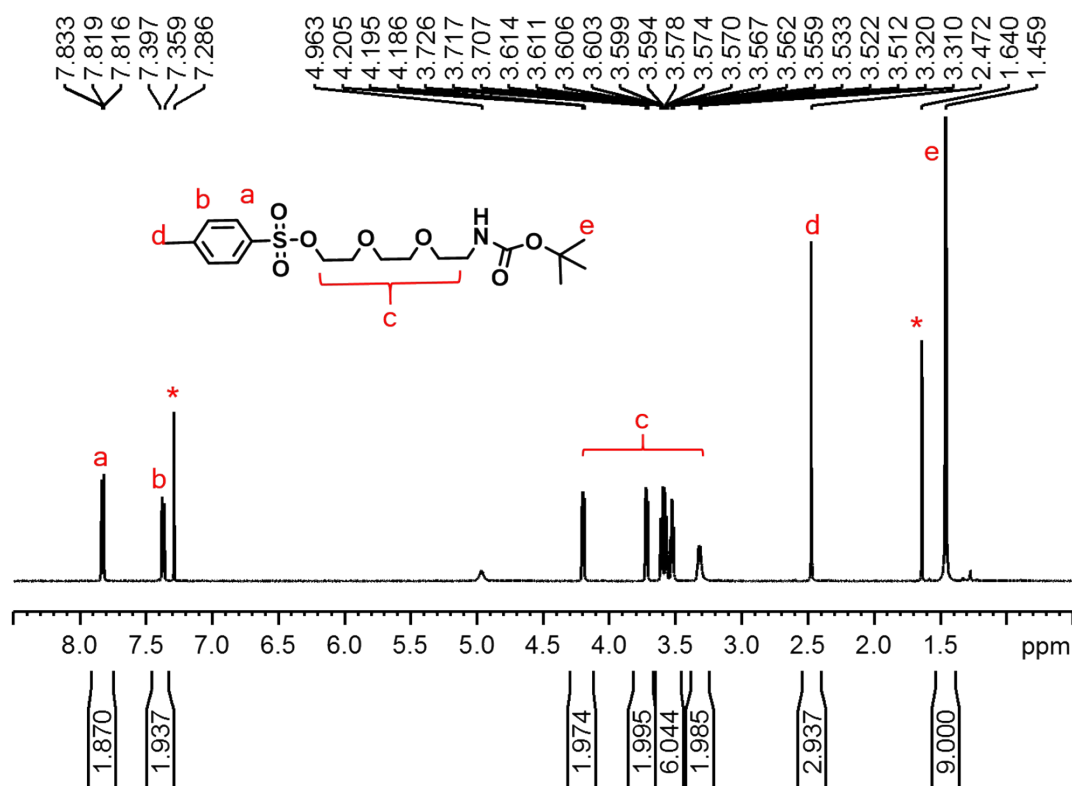

**Figure S1.** <sup>1</sup>H NMR spectrum of compound **2** in CDCl<sub>3</sub>. Signals from solvents are marked with asterisks.

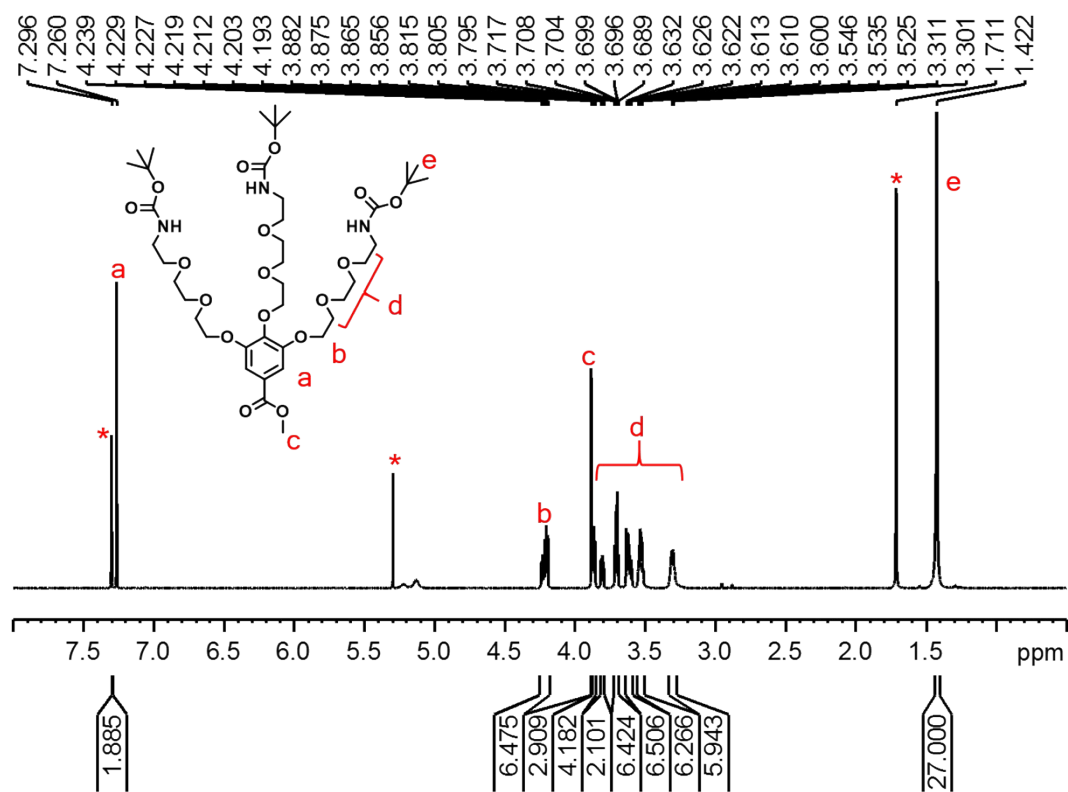

**Figure S2.** <sup>1</sup>H NMR spectrum of compound **3** in CDCl<sub>3</sub>. Signals from solvents are marked with asterisks.

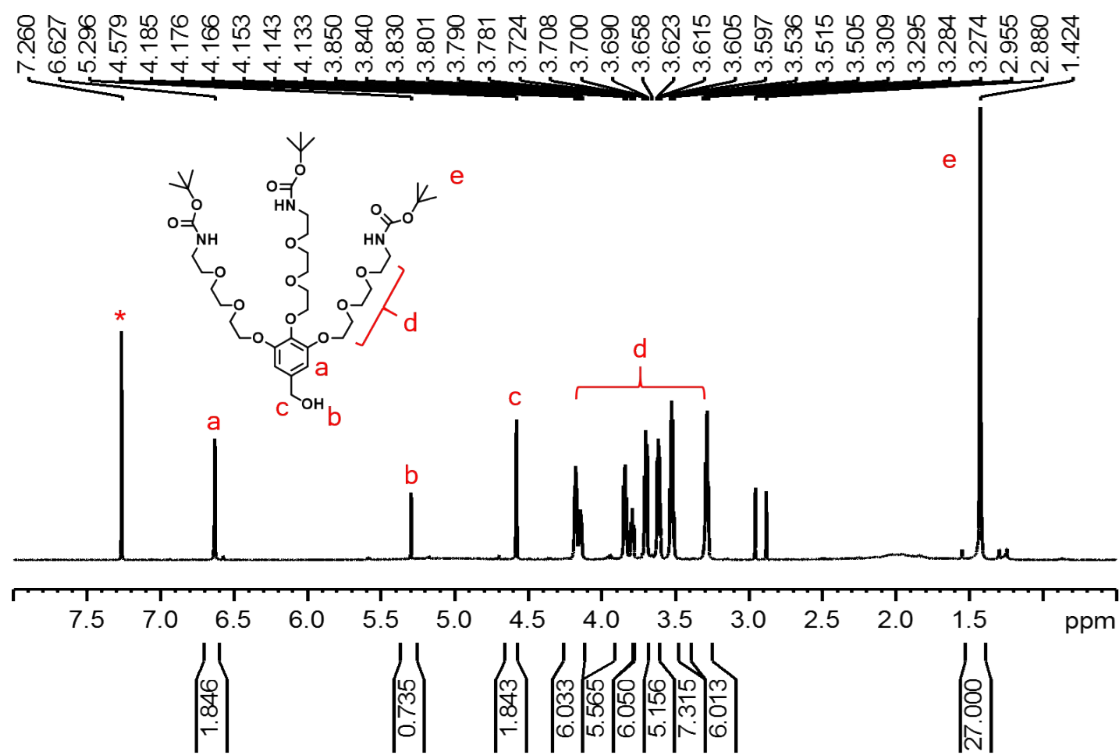

**Figure S3.** <sup>1</sup>H NMR spectrum of compound **4** in CDCl<sub>3</sub>. Signals from solvents are marked with asterisks.

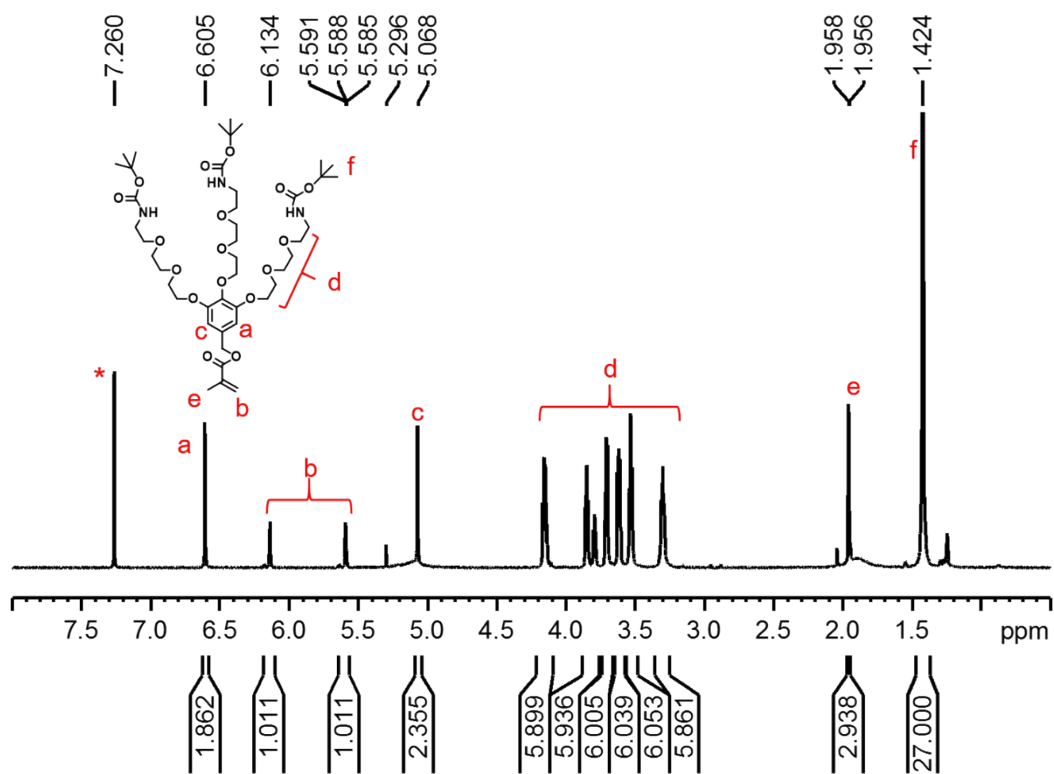

**Figure S4.** <sup>1</sup>H NMR spectrum of MG1-Boc in CDCl<sub>3</sub>. Signals from solvents are marked with asterisks.

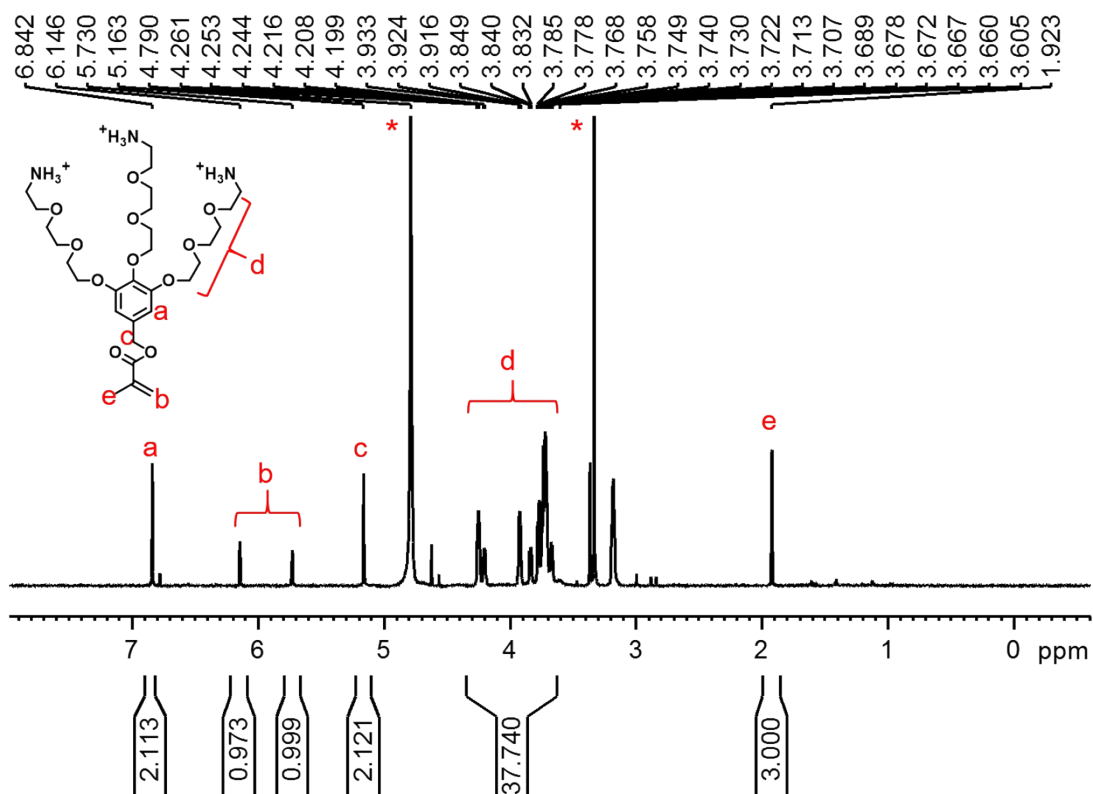

**Figure S5.** <sup>1</sup>H NMR spectrum of MG1-NH<sub>3</sub><sup>+</sup> in CDCl<sub>3</sub>. Signals from solvents are marked with asterisks.

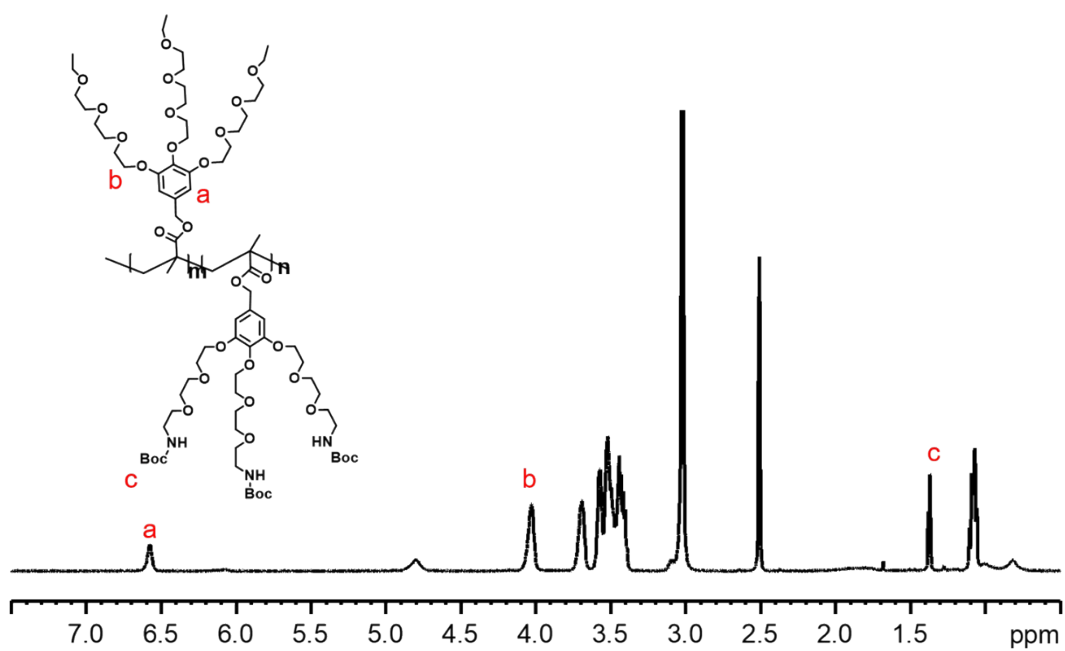

**Figure S6.**  $^1\text{H}$  NMR spectrum of **P1-Boc** in  $d_6$ -DMSO.

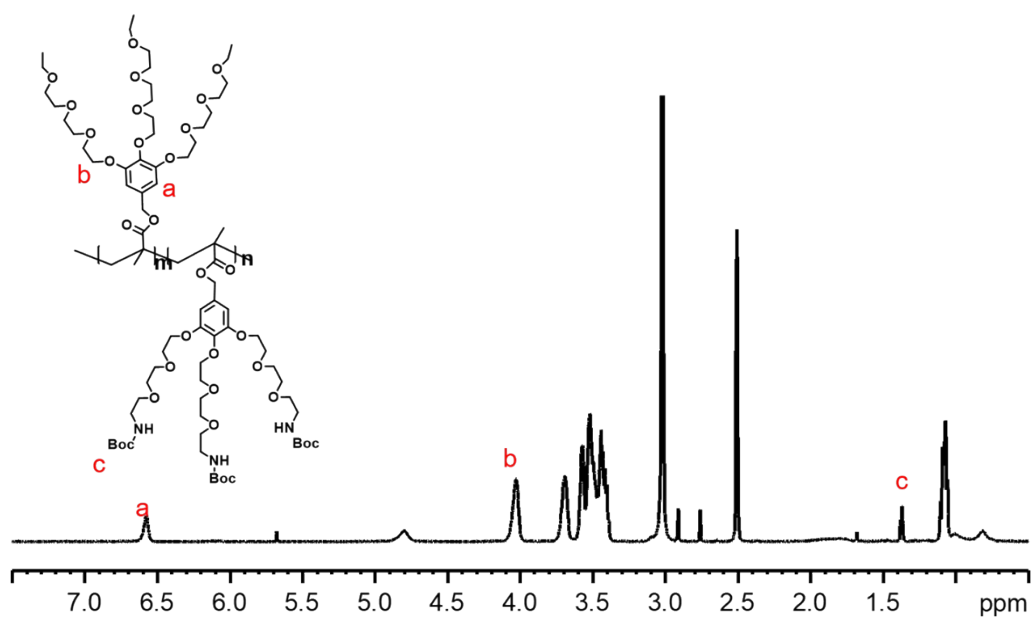

**Figure S7.**  $^1\text{H}$  NMR spectrum of **P2-Boc** in  $d_6$ -DMSO.

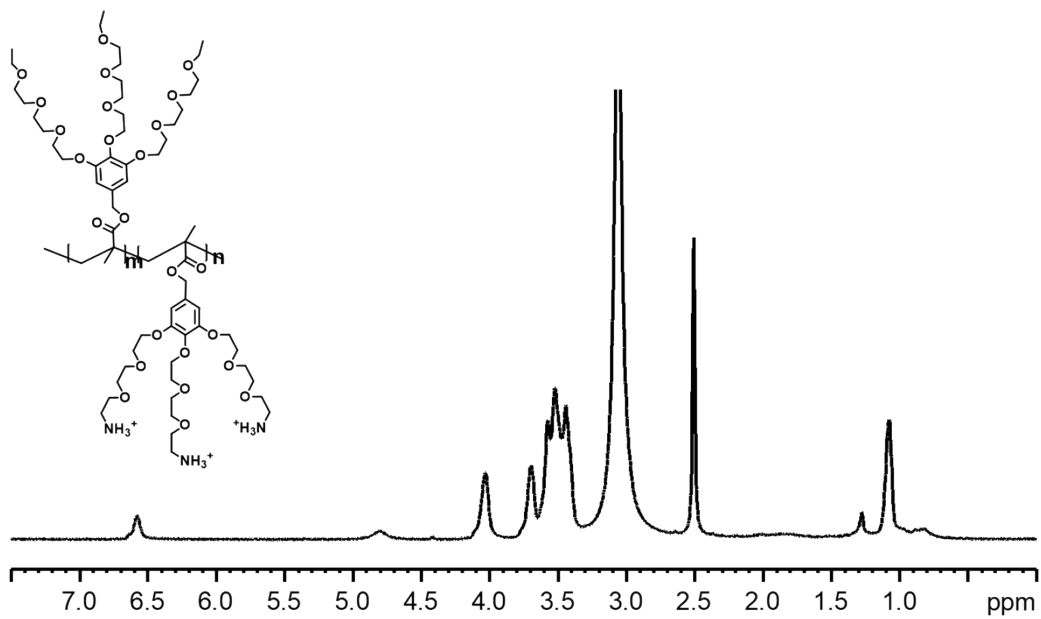

**Figure S8.** <sup>1</sup>H NMR spectrum of P1 in *d*<sub>6</sub>-DMSO.

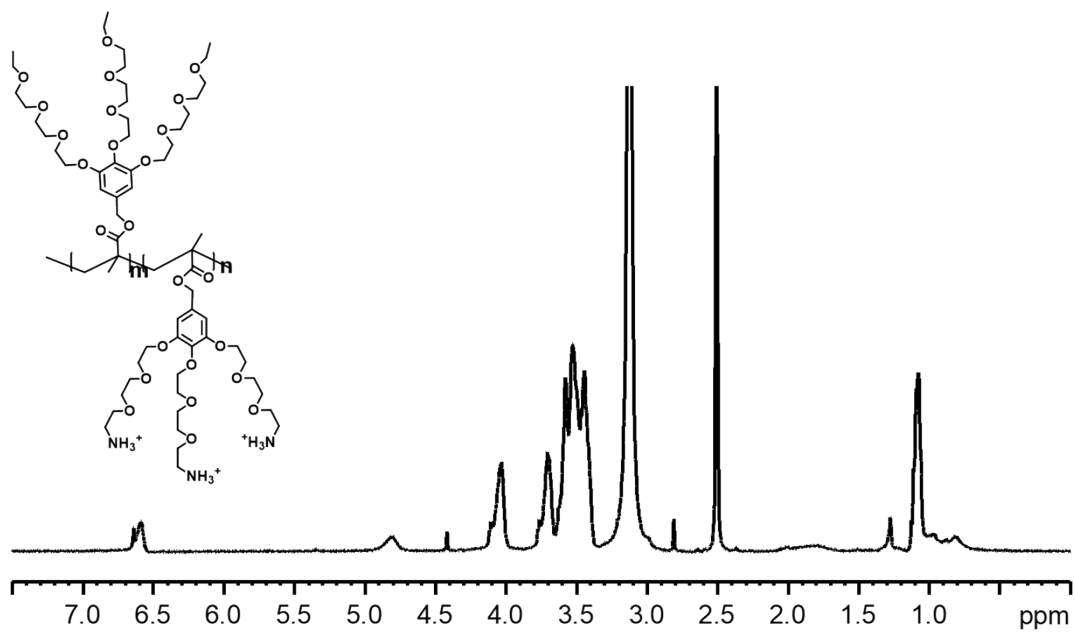

**Figure S9.** <sup>1</sup>H NMR spectrum of P2 in *d*<sub>6</sub>-DMSO.

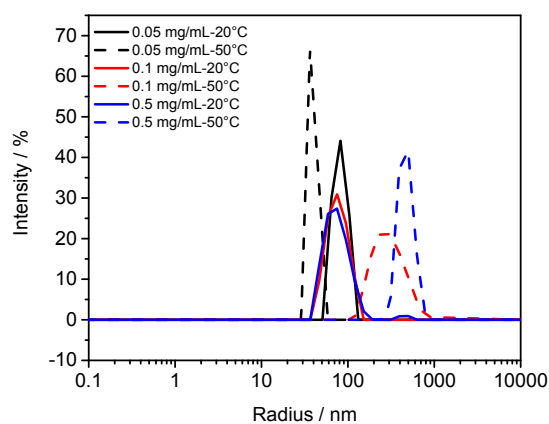

**Figure S10.** Hydrodynamic radius of NGs by dynamic light scattering in pH=7.4 PBS buffer at different concentration and temperature.

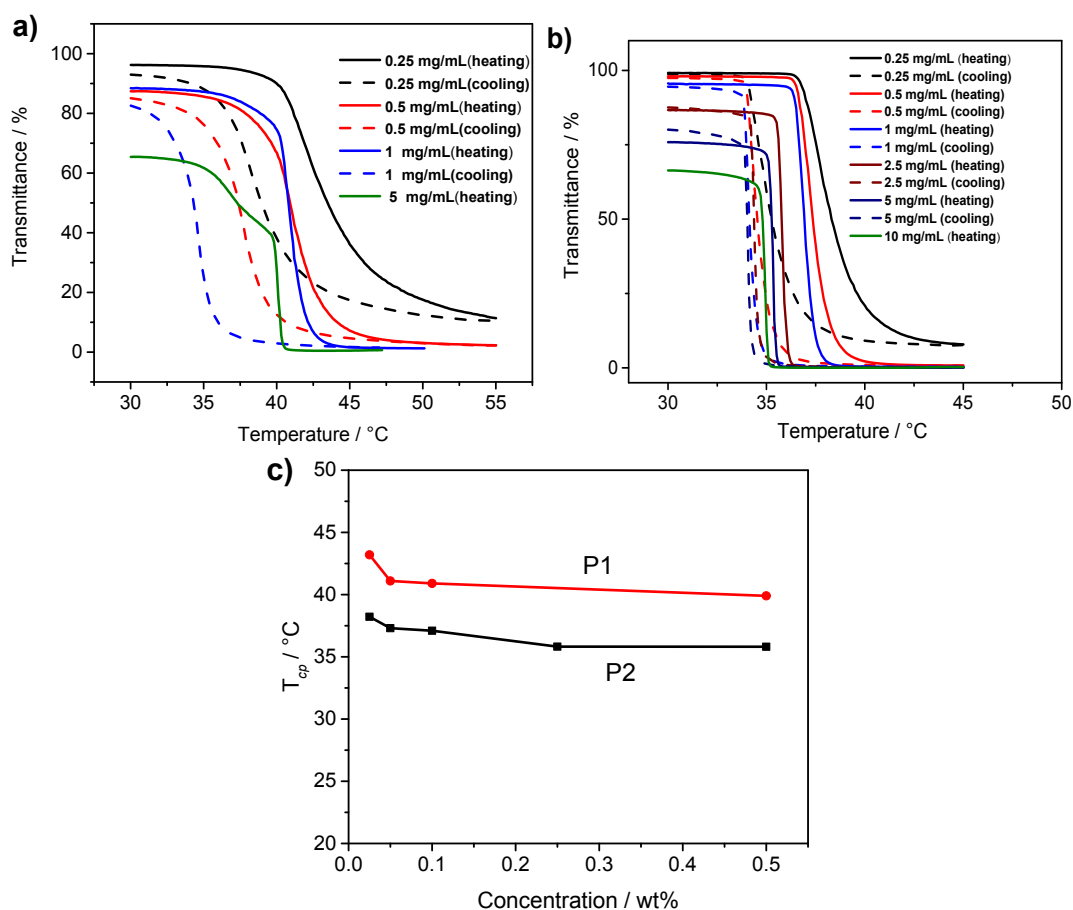

**Figure S11.** Plots of transmittance vs temperature for **P1** (a) and **P2** (b) in pH=7.4 PBS buffer at different concentrations, as well as (c) dependence of  $T_{cp}$  of **P1** and **P2** on solution concentrations.



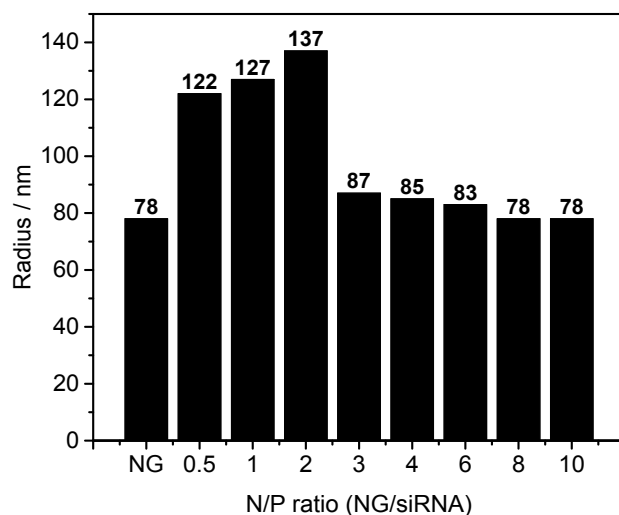

**Figure S12.**  $R_h$  of NGs/siRNA complexes at different N/P ratios at room temperature. The complexes were incubated for 30 min before measurements ( $C = 0.02 \text{ mg}\cdot\text{mL}^{-1}$ ).

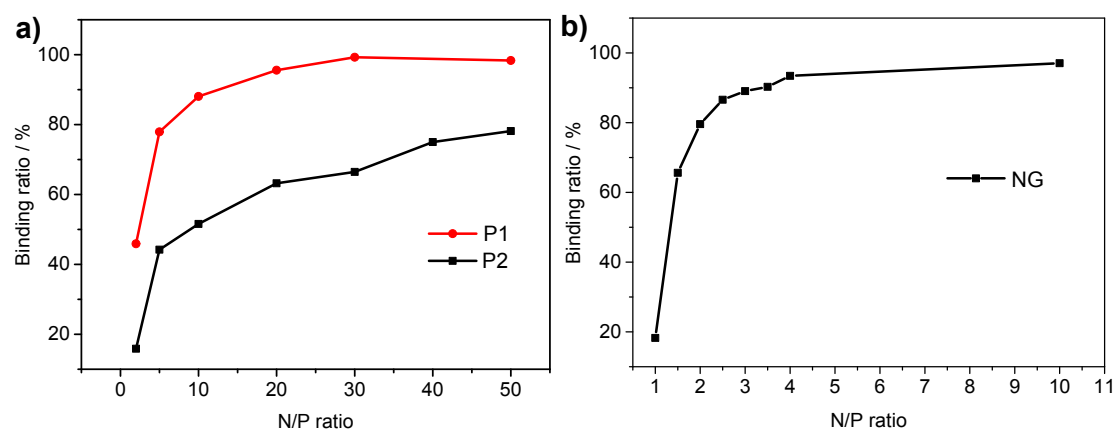

**Figure S13.** Quantitative siRNA binding ability of **P1** and **P2** (a), as well as **NGs** (b) by adding fluorescent dye EB using fluorescence spectrophotometer.  $C = 0.05 \text{ mg}\cdot\text{mL}^{-1}$ .

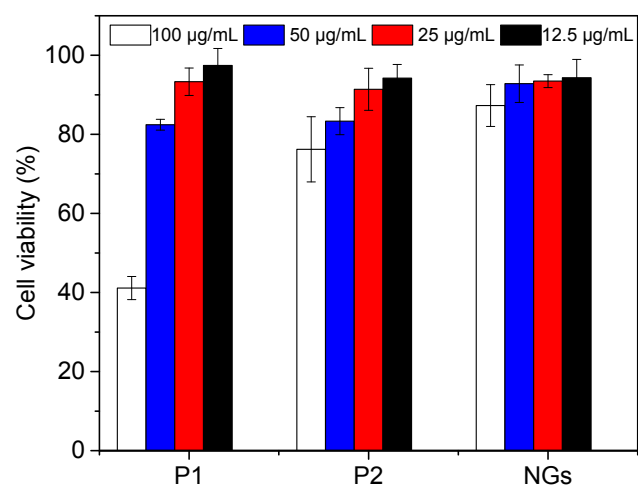

**Figure S14.** Cell viability of BV2 cells after incubation with cationic polymers **P1**, **P2** and **NGs** at different concentrations.

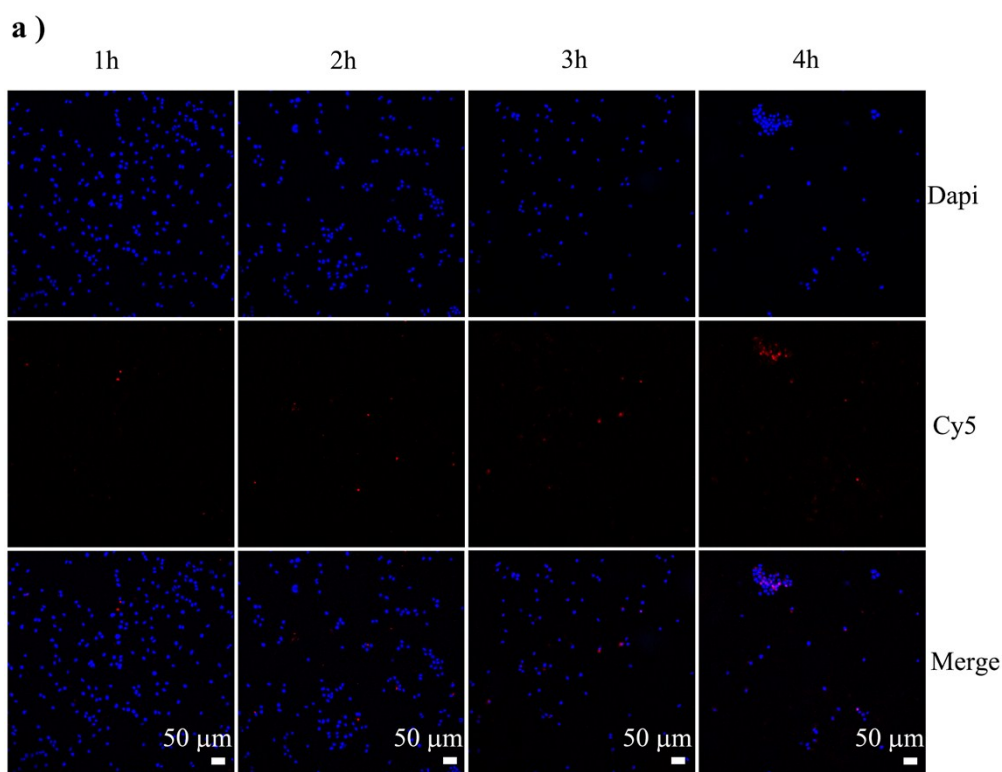

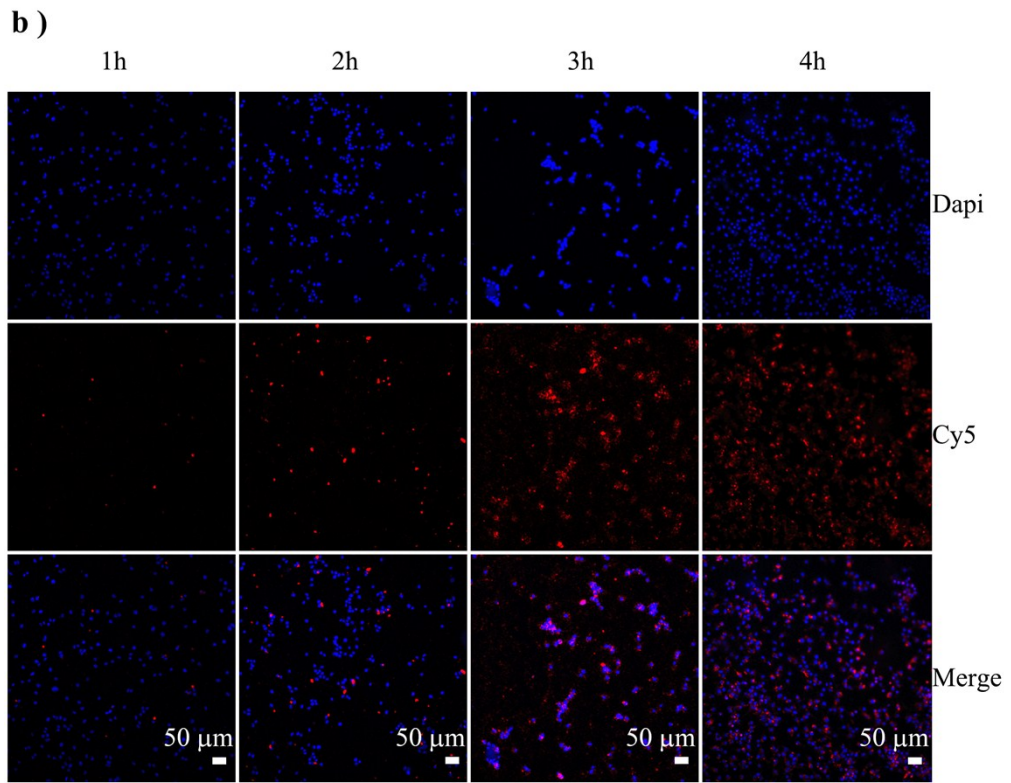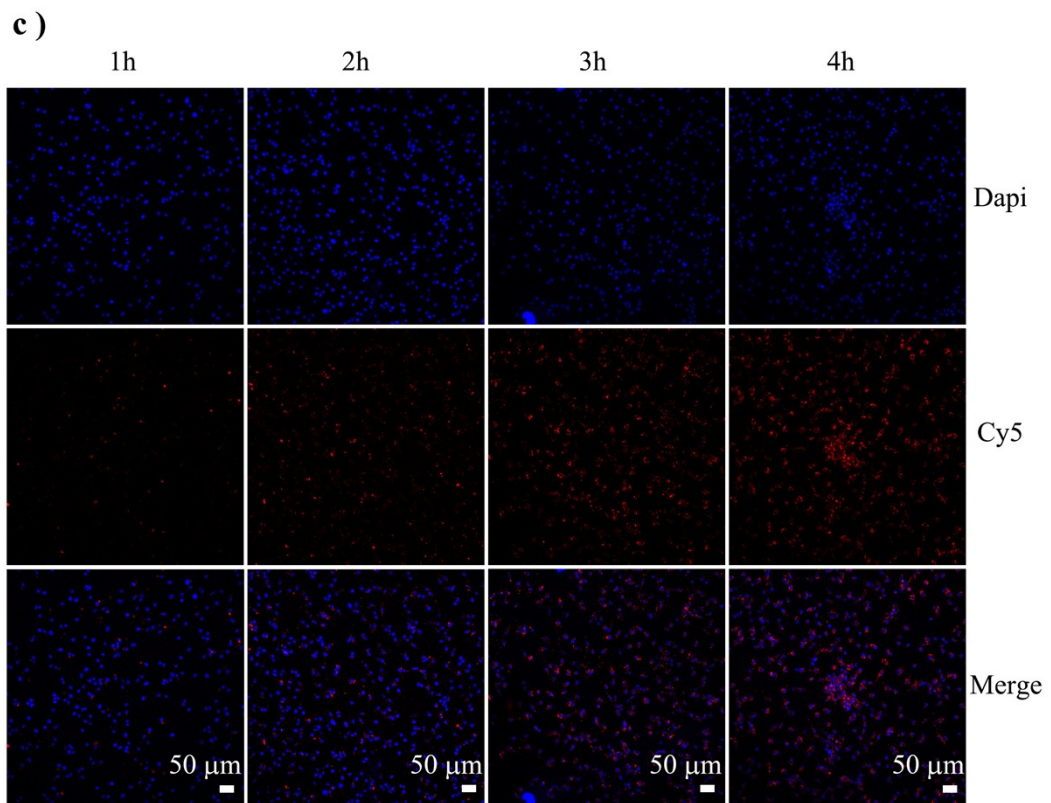

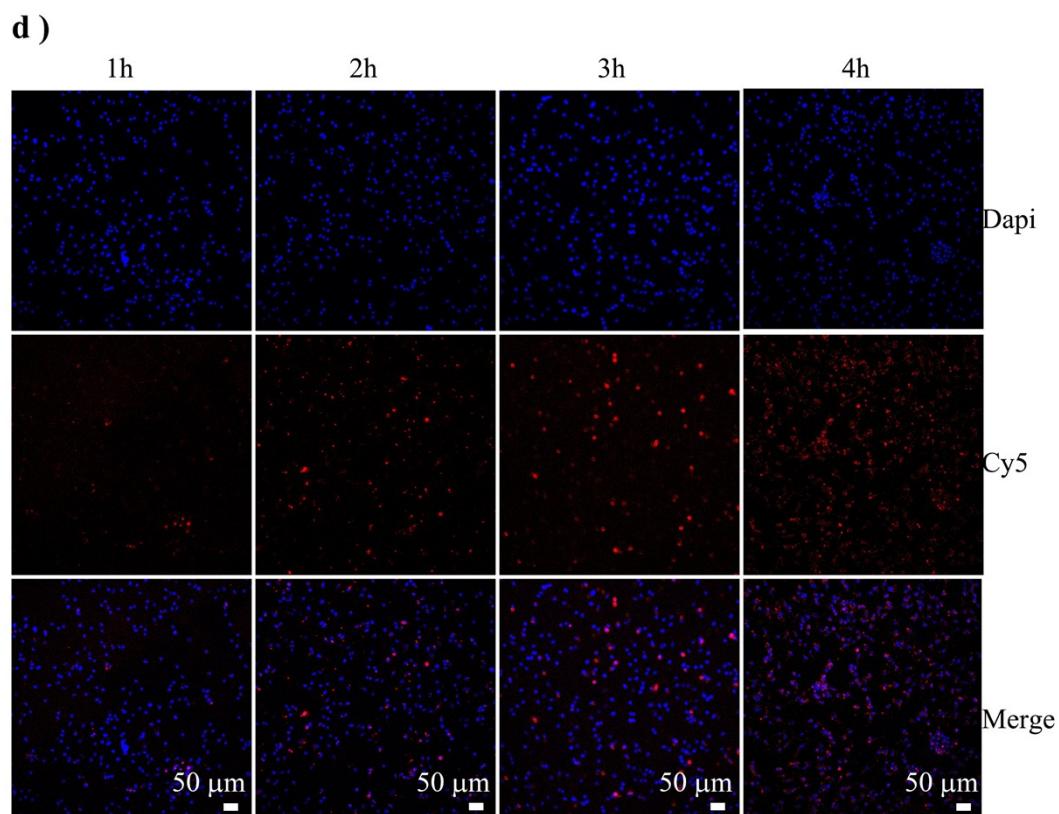

**Figure S15.** CLSM images of BV2 cells after being treated with Cy5-siRNA/**P1** (a), Cy5-siRNA/**P2** (b), Cy5-siRNA/**NGs** (c), Cy5-siRNA/Lipofectamine 3000 (d) complexes for 1-4 h at N/P ratio of 10.
